# Supplementary material for: A tissue-like platform for studying engineered quiescent human T-cells’ interactions with dendritic cells
Source: eLife journal article supplement (doi:10.7554/elife.48221), 2019-09-25
Supplement: supp [file elife-48221-supp-v1.zip]

Archive with 25 entries (25 files):
- elife_poa_e48221_Video_8.mp4
- elife_poa_e48221_Video_12.mp4
- elife_poa_e48221_Figure_2_figure_supplement_3.pdf
- elife_poa_e48221_Video_5.mp4
- elife_poa_e48221_Figure_4_figure_supplement_2.pdf
- elife_poa_e48221_Figure_3_figure_supplement_1.pdf
- elife_poa_e48221_Video_9.mp4
- elife_poa_e48221_Transparent_Reporting_File.pdf
- elife_poa_e48221_Video_3.mp4
- elife_poa_e48221_Video_7.mp4
- elife_poa_e48221_Video_1.avi
- elife_poa_e48221_Figure_2_figure_supplement_4.pdf
- elife_poa_e48221_Figure_2_figure_supplement_2.pdf
- elife_poa_e48221_Video_10.mp4
- elife_poa_e48221_Figure_2_figure_supplement_1.pdf
- elife_poa_e48221_Video_4.mp4
- elife_poa_e48221_Figure_5_figure_supplement_1.pdf
- elife_poa_e48221_Figure_4_figure_supplement_1.pdf
- elife_poa_e48221_Video_2.mp4
- elife_poa_e48221_Figure_2_figure_supplement_5.pdf
- elife_poa_e48221_Figure_2_source_data_1.xlsx
- elife_poa_e48221_Figure_3_source_data_1.xlsx
- elife_poa_e48221_Video_11.mp4
- elife_poa_e48221_Figure_4_source_data_1.xlsx
- elife_poa_e48221_Video_6.mp4
