# Supplementary material for: A tissue-like platform for studying engineered quiescent human T-cells’ interactions with dendritic cells
Source: eLife journal article supplement (doi:10.7554/elife.48221), 2019-09-25
Supplement: supp [file elife-48221-supp-v1.zip › elife_poa_e48221_Figure_2_source_data_1.xlsx]

## Sheet: TCR expression statistics
1G4	6f9	6f9 blasts
72	78	98
81	66	99
90	72	98.6
80.3	64	97.9
89.9	73.3	97.8
80.5	65	99.1
89.1	80	98
77	52	95.7
71	63	99
85	78.8	98
83	88.8	97.9
71	76.4	95.3
88.3	73	97.5
	76	97.9
	68.4	98.2

## Sheet: CD3 z
	gMFI
no TCR	98.6	47
+TCR	423	422
+TCR+CD3z	609	632
