# Supplementary material for: A tissue-like platform for studying engineered quiescent human T-cells’ interactions with dendritic cells
Source: eLife journal article supplement (doi:10.7554/elife.48221), 2019-09-25
Supplement: supp [file elife-48221-supp-v1.zip › elife_poa_e48221_Figure_3_source_data_1.xlsx]

## Sheet: Express DC
	monocytes	DCs	acDCs	media
Angiogenin	1.78104	1.63386
Angiopoietin-2	1.8229		1.64711	1.4992
Apolipoprotein A-I	1.68133	1.49177
BAFF	1.93994	1.6371	2.95123
BDNF	2.81623	1.99454	1.72055
CCL17		12.6163	15.5618	2.10241
CCL2			2.35341
CCL3/CCL4			2.16261
CCL5	5.6193	4.30525	5.75695
CD14	3.31081	2.07235	2.01138
CD31	9.9249	7.5579	6.47535
CD71	1.7779	1.68713	1.64909
Chitinase 3 like1	2.67822	1.71659	4.13549
Complement Factor D	2.61272	2.51594	2.60579
CXCL10	1.5879		7.45368
CXCL11			3.57603
CXCL12			1.47294
CXCL4	10.4105	9.94992	8.1175
CXCL5	1.64722
CXCL9 MIG			10.7664
Cystatin C	1.82855	6.04297	3.6744
Dkk-1	1.54321		1.60942
EGF	1.8645	1.50632	1.46849
Emmprin	4.5957	3.91012	3.50517
Endoglin	7.06405	2.93789	2.33281
FGF-19		1.4649
Flt-3 Ligand		1.78787
GDF-15			1.90222
GM-CSF	0*	16.00772*	22.68708*
ICAM-1	1.74478	1.92638	2.01411
IFN-gamma	1.70704	1.48652	3.99973	2.36031
IL-17A			1.69118
IL-18 Bpa	2.06988	4.70663	6.0449
IL-1a	1.47226	0	1.45794
IL-1b	0	0	3.44942	2.30861
IL-1ra	2.1694	2.64555	3.8202
IL-27			1.46693
IL-4	0*	7.59622*	7.55725*
IL-5	1.59245	1.51875	1.55122	1.62125
IL-6			3.93272
IL-8	3.73108	0	11.055
Kallikrein 3	1.82079	1.6484	1.9031
Lipocalin-2	1.55673	0	1.6504
MIF	3.16577	2.87051	2.41935
MIP-3alpha			4.56182
MIP-3beta			3.91228
MMP-9	2.4008	4.99797	6.34
Myeloperoxidase	1.97265	1.66957	1.59947
Osteopontin	3.89797	6.27417	6.49622
PDGF-AA	3.06764	2.58063	2.78953
PDGF-AB/BB	2.09153	1.90506	1.88479
Pentraxin 3	2.07588	1.99171	2.39805	1.81757
Resistin	1.62046		1.66925
Serpin E1	13.5466	9.62222	13.3973
SHBG	1.60462	1.48667
TGF-alpha		1.58646	2.5176
THBS-1	5.29919	3.40704	5.15749
TIM-3	5.08368	4.44138	4.42719
TNF alpha			10.6053	10.8834
uPAR	6.7068	5.78137	7.06112
VCAM-1			1.55874
VEGF			2.78093
Vitamin D	1.84177	1.67896	1.72626	1.55422

## Sheet: Classical DC
	monocytes	DCs	acDCs	media
Angiogenin	2.08256	2.50544	4.77854
Angiopoietin-2		1.69336	1.95766	1.4992
Apolipoprotein A-I	1.67964	1.82804	2.6543
BAFF	2.03122	4.37345	5.87052
BDNF	1.74942	2.02537	2.74974
C5/C5a			1.47487
CCL17		11.584	15.5117	2.10241
CCL2	3.38549	1.98654	5.71831
CCL3/CCL4		2.06868	4.81627
CCL5	4.72586	3.34369	5.77876
CCL7			1.4731
CD14	2.77401	2.66888	4.36556
CD147			6.48938
CD26			1.48997
CD30			1.54344
CD31	7.15646	7.50681	10.9972
CD40L			1.75277
CD71	1.49815	1.78672	2.51768
Chitinase 3 like1	7.30109	7.8368	13.3286
Complement Factor D	3.15614	3.70792	5.66941
CXCL1			4.83231
CXCL10	1.58168		14.5538
CXCL11			18.438
CXCL12		1.55193	1.97231
CXCL4	6.97645	5.69668	10.9931
CXCL5	1.46029		1.95414
CXCL9			13.7922
Cystatin C	1.514	9.16007	13.4365
Dkk-1	1.47422		1.76444
EGF	1.54924	1.60845	2.47408
Emmprin	3.31802	4.72434
Endoglin	5.90295	4.32469	6.09116
FGF-19		1.49404	3.27387
Flt-3 Ligand
G-CSF			1.5012
GDF-15	1.67325	5.72565	9.95955
GM-CSF		15.99455*	24.17498*
HGF	1.48457	1.47576	1.93418
ICAM-1	1.74478	2.14145	4.71645
IFN-gamma	1.70704	1.65976	4.80697	2.36031
IL-10			1.59737
IL-16		1.51672	2.25315
IL-17A		1.61122	2.64995
IL-18 Bpa	3.07118	8.00772	12.0501
IL-1a	1.69317		1.77783
IL-1b	0		4.27317	2.30861
IL-1ra	3.0509	1.69317	5.04121
IL-22			1.49195
IL-24			1.50578
IL-27			1.68925
IL-32			1.5242
IL-4		7.71169*	10.15235*
IL-5		1.61162	1.85389	1.62125
IL-6			6.96014
IL-8	9.01149	2.0489	16.1705
Kallikrein 3
Lipocalin-2		1.50891	1.78901
M-CSF			1.46558
MIF	2.58287	2.57967	4.78103
MIP-3alpha			12.2631
MIP-3beta			2.39474
MMP-9	2.26803	5.55584	8.09037
Myeloperoxidase	1.94709	1.702	2.34078
Osteopontin	3.81447	7.82608	12.1648
PDGF-AA	2.3937	2.73934	3.37407
PDGF-AB/BB	1.55985	1.90041	3.29484
Pentraxin 3	1.71334	2.1462	3.06611	1.81757
PSA		1.92886	2.17926
RBP-4			1.536
Relaxin-2			1.60758
Resistin	1.44932	1.44807	1.70951
Serpin E1	13.0673	6.8632	10.6541
SHBG		1.57731	2.05581
ST2			1.66866
TFF3			1.65262
TGF-alpha		2.27631	5.3078
THBS-1	3.67172	3.31344	5.2619
TIM-3	4.38461	9.85469	15.3838
TNF alpha			18.1244	10.8834
uPAR	5.07657	6.35294	11.0098
VCAM-1		1.61477	2.50704
VEGF			1.75212
Vitamin D	1.58061	1.94327	2.12607	1.55422

## Sheet: DC activation
	acDC
CD80	16.9024	13.7037	36.7089	15.0299
CD86	10.3565	14.73	43.705	17.1377
ICAM1	4.33186	3.42474	3.88363	4.37978
CD40	3.78763	3.78505	4.41161	5.69208
HLA-DP	6.62362	10.8813
