# Supplementary material for: A tissue-like platform for studying engineered quiescent human T-cells’ interactions with dendritic cells
Source: eLife journal article supplement (doi:10.7554/elife.48221), 2019-09-25
Supplement: supp [file elife-48221-supp-v1.zip › elife_poa_e48221_Figure_4_source_data_1.xlsx]

## Sheet: Chemokine speeds
no chemokine			CCL19			CCL21			CXCL12
nCD8	nCD4	DC	nCD8	nCD4	DC	nCD8	nCD4	DC	nCD8	nCD4	DC
9.49782	6.60312	1.70432	7.97544	0.441836	1.08278	1.8223	13.0745	1.82719	5.65675	7.74732	0.184218
5.16443	8.1921	1.078	9.66192	11.5171	0.528646	0.993522	11.0992	0.349972	10.0267	5.48579	0.466453
6.17856	7.68528	1.71855	10.5929	10.4754	0.342964	7.38348	11.721	0.139417	9.57048	5.66117	1.55519
2.36542	8.01738	1.62889	4.15121	6.9588	0.197152	8.11884	9.7164	1.71016	6.9282	5.51799	2.72234
4.63888	2.48549	1.74405	0.66225	9.81024	1.50329	7.01244	6.60822	0.173275	5.8731	6.02454	0.224923
7.19472	6.65802	2.09838	10.1989	10.691	1.2033	6.96666	9.42396	0.70944	1.57235	6.41466	2.22583
2.94743	6.03642	0.241814	8.5806	2.99629	0.711168	6.1737	10.48	0.789546	9.18258	0.431042	0.233623
7.9116	2.98063	0.35885	10.9628	9.43146	0.697818	6.21378	10.9858	1.35715	4.88211	5.18489	1.0397
5.44685	6.5016	1.15187	1.00281	11.0968	0.326954	4.97943	8.46468	0.631446	6.31134	7.84824	1.115
6.0327	0.518423	2.96741	9.77442	6.9747	1.31291	6.25698	5.66469	0.382202	4.87961	9.1968	0.648936
7.17846	9.00276	0.883536	9.56832	10.0817	0.0799134	7.29384	12.6917	0.988626	6.84666	6.88422	1.73614
3.33072	1.28282	0.0957492	2.15514	14.2817	0.84945	8.52222	10.3711	1.47179	5.97338	9.81354	0.569327
5.2994	6.21912	0.259164	0.76944	9.68808	1.23838	9.5331	8.0166	1.03381	8.2101	6.54042	0.61845
3.74	7.46118	1.05992	10.7189	11.7312	1.08736	2.01803	8.86686	0.707124	8.90844	6.9	0.202614
1.48237	7.96872	0.746046	8.61576	9.66198	1.47808	5.05961	9.41628	1.69445	8.23506	4.70839	2.20702
8.19618	11.2483	0.823416	5.84671	9.77142	0.381514	7.27578	5.9621	0.969504	4.65611	6.4056	1.76558
6.58344	2.48709	2.18849	4.54599	9.92478	1.0292	5.5979	9.19824	1.55789	7.94754	5.53787	2.04133
8.44206	5.97732	1.64136	3.1528	10.2285	0.307896	3.86628	9.4857	1.41915	8.51322	8.78298	0.584319
7.51806	9.40872	0.105131	2.854	10.3129	0.322394	7.42368	10.6028	0.33809	6.06102	4.46177	1.30593
8.50044	4.36225	1.21728	9.95574	10.4395	0.521284	10.5854	10.8901	1.12253	7.35912	6.67362	1.30313
3.44394	6.95262	1.60793	7.76352	8.4504	1.96616	9.95994	8.2671	0.91689	8.50998	10.3903	0.296134
6.9489	0.226552	0.070671	4.38982	11.1428	0.582147	8.33436	8.35446	0.343366	8.57118	4.21312	0.208078
6.16428	6.01332	0.58868	9.2337	9.2661	1.2863	7.5066	8.8953	0.51214	11.2012	7.71114	1.16628
5.5501	7.30662	0.385981	10.2724	7.10106	0.418504	8.52288	8.69178	1.23071	13.1291	5.812	1.34776
6.70098	0.267749	0.101384	9.79362	9.46698	0.489928	0.521095	6.45012	1.80673	9.98712	8.0532	2.71034
7.05348	5.19562	0.648978	10.0273	9.74262	0.340835	5.74572	9.78552	0.882732	2.75635	2.01992	2.23625
9.58602	7.51284	2.14608	11.231	10.1722	0.331528	7.49844	9.04698	0.716448	8.33676	10.3274	1.19472
4.05381	10.4131	0.112618	11.7737	8.94654	0.282801	8.28456	11.3923	1.61893	9.4005	10.6478	0.113577
5.22808	7.29114	0.0927522	9.2808	8.1678	1.28533	8.07852	8.9613	0.982056	11.1382	7.89246	0.108414
6.2316	5.33419	0.170282	0.855258	10.7296	0.284389	7.5156	8.57922	0.230445	8.72118	10.8293	3.32935
2.58048	9.00546	1.90146	8.51772	9.34686	1.59095	5.22243	8.33904	0.197649	4.6382	8.18298	1.44545
8.5626	4.7885	0.96432	9.45246	6.2322	0.353121	6.7929	10.8508	1.13265	8.7222	9.60642	1.92236
6.8436	5.96696	1.21465	10.7656	9.25686	0.423917	8.66394	13.6867	1.17617	11.2841	9.80184	1.5238
6.51498	0.615534	0.261608	10.9945	11.0708	1.42615	6.41628	11.2264	1.25598	7.3683	8.53896	0.625326
7.2423	8.70504	1.14865	9.95226	9.79368	0.282324	7.85076	8.4729	0.954486	6.84036	8.92212	1.52942
5.82995	5.519	1.52336	7.49952	10.8952	0.557477	0.83187	8.21514	0.85956	3.34327	9.81264	2.11922
8.38122	5.58197	1.04445	10.9419	3.52462	0.429113	5.63279	4.12549	0.191588	9.58464	9.25548	0.597065
0.46093	7.23888	0.129764	7.5801	8.6091	1.47724	7.4655	12.3274	0.267115	7.58784	9.82698	1.93751
6.46896	0.200022	1.67086	8.14794	10.6161	0.672342	0.162013	2.64896	1.34953	8.15286	9.48792	0.12324
6.98442	10.0317	0.55956	8.36694	7.30008	1.60849	0.682014	8.04798	0.631752	12.2989	9.9711	0.305723
4.25663	8.6913	0.195069	10.2846	1.64801	2.13286	7.58088	5.40824	0.321547	9.46284	8.89452	1.47677
5.07293	9.56316	1.22485	3.29638	9.35238	0.341281	4.97119	10.6343	1.74979	5.82735	5.96891	0.258349
4.53689	0.677592	0.444267	5.01438	10.4863	1.52866	5.99185	8.1447	1.43208	9.16488	9.96192	2.54035
5.36613	8.51838	0.70407	9.96708	8.4999	0.281046	5.6782	8.29074	1.55071	8.49414	6.29226	4.45739
2.98823	10.2364	2.06654	11.8404	10.5898	1.60816	4.94408	9.25866	1.17343	8.80116	7.06716	0.396905
4.50532	8.27172	0.62775	9.6957	10.5655	5.05672	2.51543	7.73616	0.2208	10.9838	9.62568	1.04067
5.86086	10.0462	0.515027	8.3613	7.70358	1.70272	7.9224	9.30492	0.535831	6.72378	5.55584	0.1331
4.10794	5.24996	2.09724	6.61164	12.9772	1.09082	3.75657	2.9342	0.950022	7.79394	8.9844	0.752154
5.96229	7.40934	2.16473	7.82244	5.06572	0.660894	9.41478	8.2245	1.40531	8.56104	10.2422	0.883548
6.2604	9.4746	0.747816	9.37812	9.68022	1.28281	10.1123	4.23281	0.649302	10.7653	7.65084	1.96075
5.11484	11.9413	0.102822	12.0418	7.2603	1.08188	10.4698	16.4344	0.772284	7.04244	8.16876	0.695268
0.323758	3.37195	1.16004	10.0593	3.25499	1.91827	9.53484	4.6592	0.508291	8.22516	13.1884	0.931254
7.18518	7.91358	0.991206	10.923	11.944	2.02399	8.26392	11.278	0.616068	6.72942	8.85264	0.267532
6.08106	3.73695	0.388703	2.00817	9.2172	1.47407	10.5077	9.88212	0.706944	7.58946	10.9032	1.50245
6.63648	8.32344	1.61105	1.59139	9.14412		7.90488	8.27574	1.53944	6.98388	10.0439	0.199787
9.10548	7.13928	1.46962	8.10312	4.77723		9.7749	10.8594	0.784596	6.3672	7.05576	2.72114
2.97884	4.57045	1.72004	3.05227	5.96391		10.7971	12.7409	0.844668	2.11622	8.50764	0.404767
3.14096	7.25868	0.452282	7.36512	1.31603		9.2931	10.7476	0.99627	9.6399	8.74602	0.916194
9.04794	7.55442	0.230428	6.27594	5.69705		7.68132	10.0909	1.18469	7.00872	11.1393	0.374532
2.28033	6.83064	0.902508	8.44074	8.63406		11.1755	10.2119	0.0815928	6.07668	6.71244	1.23965
9.8292	6.54876	0.258787	1.82621	5.19905		7.93284	17.076	0.486664	7.98084	9.79374	0.263666
8.27724	10.2526	0.698778	8.49018	5.51171		9.00162	8.34204	1.44215	9.71928	4.89362	0.871092
7.07928	0.281702	0.944148	6.42786	10.5972		5.85071	9.44544	1.4907	8.77896	11.4691	1.97623
9.8565	9.89814	1.78543	7.806	11.7784		10.4121	8.25636	2.22356	5.1557	7.01586	1.00296
9.44682	10.4759	0.21239	2.78929	7.24104		11.5052	11.5476	0.578329	6.6132	17.8745	0.193489
8.40852	9.83484	0.862374	10.3462	12.0539		11.5021	11.7117	0.946398	9.29268	9.60096	1.37383
9.14808	8.34654	0.7917	0.74682	5.17728		8.6694	13.6112	0.243962	7.43322	8.07198	1.63715
6.3006	5.98211	1.53768	0.474197	4.68323		8.67084	15.769	0.164154	7.62498	4.9132	0.218822
9.56862	7.09902	0.381857	9.87018	7.20444		5.92774	17.2296	1.29367	8.50656	6.04638	1.88392
5.7677	0.22639	2.14931	8.41788	5.62756		8.45334	10.4229	1.02022	8.73198	8.47038	1.71434
0.725034	8.1306	1.91449	5.84014	9.3852		8.54742	7.35966	1.24878	9.3846	9.32892	0.961716
4.76072	9.91824	0.408694	5.33726	9.46716		6.70716	6.83592	0.167872	10.3952	11.9635	0.40559
4.48136	5.99239	0.349876	10.9411	8.46984		6.16716	6.86562	0.483177	7.60098	7.23588	1.74395
4.08752	9.67878	0.07833	10.9516	9.62022		9.97584	6.99246	1.8149	9.1617	9.78024	1.25977
9.94188	10.8938	0.6771	9.1011	11.8957		4.25032	8.17716	1.45362	6.65538	9.16044	0.652416
4.23315	6.57108	1.74875	5.72578	6.46866		9.58782	11.9271	0.228293	5.17698	11.7101	1.20095
6.9165	9.15078	0.0941574	10.6742	8.814		8.5074	9.50964	0.97341	10.9569	5.37817	0.84297
11.5174	9.26862	1.58435	9.9693	9.38424		7.62936	9.93186	0.214456	8.93526	8.11806	0.432512
2.70504	9.3084	0.17275	8.37918	9.45732		12.1555	6.65166	0.223908	10.9021	9.48072	0.749676
2.37436	9.89412	2.02891	10.2713	4.32728		10.7847	12.1343	0.650928	9.9261	8.60634	0.670746
4.48108	8.57646	0.134801	11.0593	9.87132		9.60696	9.26286	0.817482	8.27826	9.42312	1.65853
9.26766	7.63512	0.103129	9.96828	7.05504		9.84864	9.67236	0.675666	6.58752	7.73508	0.953058
10.632	7.9419	0.468791	10.765	10.5605		5.66758	15.4234	1.12857	9.30252	8.42538	1.94527
9.39174	6.39048	0.317521	6.73632	5.51486		9.3345	8.50044	0.440936	5.93913	10.0543	0.643992
9.2475	9.14334	0.125054	2.7908	9.4521		9.79422	10.5849	2.11129	6.32334	8.46312	1.44206
4.78568	7.776	0.13788	7.93146	9.98418		12.7224	11.1802	1.69121	7.58958	9.74928	1.44697
9.6468	9.9918	0.770442	6.5133	9.59112		8.3109	11.2915	0.19356	10.1159	6.63432	1.7832
4.8946	6.97788	1.34226	11.3491	9.60186		9.97854	14.3045	0.301774	8.1429	9.71472	0.971712
9.47376	1.86457	2.95482	7.30194	11.7298		14.5366	6.87756	0.87105	9.42852	11.0708	0.94776
6.40284	0.262342	0.948372	11.6009	6.9813		0.937764	10.121	1.79726	8.2263	8.17482	0.890184
17.7599	0.922176	0.258613	10.8679	9.15654		12.2792	14.0825	0.914736	9.26268	11.4628	2.33789
0.252077	5.74673	1.81194	7.18638	11.4415		15.8639	6.05088	0.218564	8.8509	11.4181
7.56852	6.51018	1.57052	10.4241	7.93284		7.84218	9.15984	0.476476	6.033	5.78494
0.092946	0.448084	0.360909	9.7632	8.53188		12.2249	7.52358	0.701436	10.665	10.8329
0.987084	0.285601	2.4404	6.80874	9.70842		13.8788	14.5403	1.3745	10.0646	12.0724
2.33738	9.38838	1.6113	8.98656	4.80811		8.15742	11.4068	1.91123	11.4072	5.18246
9.63636	8.53608	2.55701	8.77692	9.80928		10.3801	8.7939	0.737088	9.11154	7.81104
4.01638	5.05674	0.119519	8.34216	7.65288		9.99528	12.116	2.07234	10.7378	7.28862
8.12814	5.6095	2.24448	1.23715	8.09268		9.75324	11.9329	0.924048	9.99198	7.93758
0.111596	8.05962	0.461761	4.44587	11.2814		11.9649	9.60066	1.1467	6.39228	9.16134
1.94072	8.8914	1.55407	0.960438	9.47676		5.31695	13.475	1.89716	6.74706	11.2555
0.11125	7.12266	0.395245	4.89665	6.90582		10.4827	13.7904	0.945384	9.78582	5.50172
3.90269	6.44112	0.92409	7.4094	9.27918		4.32638	8.91072	0.476989	6.81816	17.5103
1.13292	4.89977	1.58437	7.19106	7.82478		6.9147	8.65428	0.347616	10.7623	9.80178
2.79809	8.00658	0.838026	8.61438	7.41558		13.5331	12.2168	0.998736	6.18912	16.2437
7.25934	9.62772	0.830688	10.8409	9.0009		14.7521	7.70814	1.03784	6.97518	5.81344
0.470291	10.2023	1.62694	3.58234	9.25116		20.219	9.14628	0.689868	6.46056	8.78226
5.99096	5.82366	0.226189	9.51372	12.4387		14.456	13.1421	1.62452	10.624	17.4625
4.90362	5.38742	2.06295	6.28026	4.22786		3.11414	9.3093	0.216171	4.61225	9.36462
6.20328	4.41092	0.861084	3.44237	12.4141		7.49622	14.7885	2.37064	7.31298	12.3456
6.9486	9.57936	0.40451	9.4416	7.18176		6.55296	2.91609	0.83697	7.9053	8.62176
8.06244	9.67566	2.72087	9.80748	1.94312		4.87033	9.99738	1.41422	7.78416	25.7932
6.88284	7.96356	1.46452	7.37256	8.98248		6.22284	8.99586	0.449275	7.52898	9.24642
7.4403	2.87165	1.67062	10.5992	5.40161		1.67991	11.2495	0.614094	9.8679	10.9025
4.00757	7.3377	0.12331	7.89816	0.560681		2.40427	6.04416	0.815868	8.25582	8.17296
7.09368	9.68004	0.10006	0.601314	11.2175		0.472448	10.8411	1.94098	6.24018	7.44282
10.2853	5.30777	1.56339	6.62724	0.712908		6.63852	11.9102	0.278788	7.54776	12.1207
8.97756	8.74662	0.0668154	7.33008	10.2142		6.12054	12.4451	0.83916	7.74408	11.4791
7.39842	7.20102	0.0348785	4.4611	13.2088		7.85922	10.0535	1.92602	1.76422	8.09652
7.15512	8.49684	0.253507	0.440242	10.2841		6.01692	12.6574	1.31522	5.83193	10.3741
0.764748	4.74844	1.75993	2.18453	12.6457		3.93782	7.82514	0.833058	7.2516	9.13098
6.14658	10.0163	1.25141	9.62058	9.2157		6.036	7.44444	0.930066	10.8625	12.1859
2.45681	5.67526	1.34597	5.97252	9.7491		8.45964	8.45292	0.242768	15.5	9.31326
7.15878	3.25301	0.450715	11.4653	3.10085		5.53379	7.27896	1.63514	8.1333	11.3014
6.95508	4.13942	1.98475	6.41088	9.01776		7.37286	9.91392	1.43214	6.06498	9.92664
5.92261	6.83916	2.27452	10.8323	11.785		3.87209	4.97682	1.04706	5.74618	9.15264
8.56968	8.57382	0.580206	9.93018	10.3519		3.30478	10.7447	0.551394	9.28482	9.74748
8.2686	9.64014	0.8121	10.2636	8.10474		6.7623	10.5475	0.364439	8.89308	7.91196
8.41164	6.70434	1.42057	9.39204	6.21768		2.44813	0.375869	0.468241	6.93648	9.0432
2.5337	6.0444		5.96207	6.28764		6.51372	6.85452	1.15369	6.22128	8.5107
4.43284	8.1582		5.59845	8.53296		6.3102	9.2166	0.146514	9.09672	6.53496
4.74854	8.84106		4.92369	0.396769		12.7851	10.1673	1.10452	7.65528	6.9042
0.268465	5.28205		10.3215	9.29886		7.28892	10.007	1.65162	8.12904	7.04406
4.63604	0.618414		7.22748	3.13486		6.01002	4.42253	0.263154	7.60308	4.01793
8.71512	0.684162		8.60346	7.76196		8.53032	8.62818	0.780852	9.03066	16.4287
10.0942	0.605526		12.5497	9.87528		9.11562	5.67254	0.650922	5.6086	6.84912
7.24476	1.29207		8.50848	9.86688		5.52601	5.96829	1.56369	9.21366	2.16581
7.85166	9.30372		10.1931	9.66582		10.247	11.0034	1.49326	8.079	9.6117
8.72478	8.24928		9.90132	10.0432		8.89806	10.0085	1.12351	9.06372	8.64612
6.07776	5.40868		1.86112	10.9568		5.61219	9.34122	1.8416	10.142	7.01304
6.3315	6.89388		9.6405	11.607		5.33006	9.5994	0.730812	10.9042	6.78768
6.52542	8.26818		9.88404	5.27791		6.12828	12.7876	1.77518	7.8918	7.29732
3.92626	7.25916		10.8122	11.8848		9.32142	10.8946	0.334387	10.3206	10.1297
3.58229	0.318134		10.3414	11.049		4.29989	7.46286	2.00155	7.10148	7.3947
5.00516	3.48198		9.69198	10.2786		7.48404	1.06744	2.02309	9.62358	7.87728
7.60254	4.10417		11.7799	10.1271		9.55866	7.74186	1.12203	11.2546	8.76654
10.1069	7.48554		10.8854	11.4834		7.81338	9.7203	1.15086	7.82424	9.66894
4.35358	0.202474		9.92976	9.29766		5.68913	6.50556	1.46617	5.92145	8.51268
6.2607	8.15448		8.72874	10.6909		4.82547	10.6507	1.41452	8.6946	7.40994
9.4419	0.882798		9.11088	11.4141		3.02669	20.5341		9.5064	4.96717
8.52714	6.73968		9.20832	10.7035		3.76019	2.16152		8.04738	0.50224
8.92398	7.4448		11.3119	9.74106		4.82786	12.7306		9.51252	9.15546
7.3146	10.2097		7.24176	10.788		4.64229	8.01882		8.65608	7.34418
6.41574	5.19461		4.27819	10.9105		5.53479	10.9933		11.1406	8.75898
7.42614	1.76296		13.3365	8.77296		6.5169	10.879		10.2515	9.50664
3.42876	8.9148		12.8107	8.02458		5.40334	9.47256		10.3435	8.18274
8.42418	8.48016		11.1729	9.84564		6.05022	8.16324		8.5692	7.92126
5.43963	8.57076		6.79626	8.18304		9.83976	7.26672		8.80338	9.92472
4.77236	1.87864		7.95186	8.4534		8.02398	8.98596		11.8877	10.5896
2.69514	6.12612		10.3227	9.15486		6.31146	9.00024			0.791364
7.90506	9.00642			13.4401		9.57552	7.72806			9.69306
7.34124	4.16777			10.4174		10.146	7.6011			11.2486
7.04844	6.75612			8.30268		4.29955	5.66479			7.48776
6.5394	0.446487			5.85113		8.45574	10.942			10.9341
2.041	6.12018			10.4513		10.1929	7.57356			5.51687
6.03642	5.98089			7.68756		3.57628	8.69088			9.26832
5.91547	10.9799			8.75274		8.95878	1.85738			7.37844
7.86396	4.91157			9.05496		8.73	9.16554			7.3311
5.96427	7.58772			11.3353		12.133	9.4491			6.49074
7.9107	7.01034			9.56802		8.98902	4.1719			7.10766
7.17048	5.97586			9.40782		9.12846	6.47898			6.73068
6.7695	11.4688			9.86442		8.65434	9.45174			9.62292
5.79058	10.2135					5.26072	6.7368			5.93711
7.87428	6.92898					6.88668	9.96726			7.54944
7.42302	8.03076					4.79647	9.2412			10.8518
7.3836	10.5102					10.6056	10.4627			4.57421
5.81841	11.9269					6.93738	8.5389			7.98588
9.80106	4.21337					8.52186	9.09336			9.08664
6.03846	6.91068					8.6874	9.10278			7.60848
7.26144	5.62917					9.89532	9.49242			7.62666
5.45503	8.26146					7.1001	11.0848			10.5987
6.64632	9.54204					10.7169	5.48844			8.10312
2.2709	9.54546					7.37754	8.1675			11.1847
8.01576	7.23048					10.8989	6.22788			20.4559
4.84651	8.10654					8.57682	8.10282			10.107
7.10208	8.55132					8.43222	18.5303			9.68538
5.2688	7.64196					5.79062	8.65056			9.68016
4.26102	7.6671					9.68682	10.1869			7.2003
7.28592	10.1892					9.69978	7.5498			9.59868
8.18664	9.1155					11.3489	10.127			10.0621
4.87052	9.99474					7.6938	9.4416			7.86648
6.39756	11.1702					10.1728	12.4469			8.76588
5.5589	21.736					8.03952	13.5434			9.17772
6.1965	9.93222					6.27486	17.6948			11.1003
5.76226	7.37778					12.7274	12.9063			8.8836
3.81724	8.91132					7.98594	8.20266			6.73926
7.44912	0.243512					9.07518	7.21536			10.556
7.04298	6.21438					11.4582	12.7213			7.4991
3.47825	8.38746					10.3191	11.0179			6.07122
2.92753	7.47444					12.3299	6.67956			7.57962
7.2897	0.359596					3.83227	8.40036			12.0083
9.0705	7.25124					6.77916	9.63708			10.122
6.65142	11.2814					12.3539	12.6846			10.0804
6.64806	8.24694					11.8403	10.6675			10.2407
8.20128	8.3058					10.0213	9.4971			9.11022
6.87234	8.58582					5.04735	6.564			19.0302
5.62877	7.7235					8.00448	7.4058			6.82716
8.85294	15.2415					9.4725	11.9731			10.0244
7.14306	6.60876					14.0189	9.78426			8.79672
6.75702	9.33522					6.5589	6.67524			14.7231
7.72902	3.51227					9.54246	9.44634			11.3729
3.86575	7.17858					6.00798	6.83916			8.33736
6.08442	9.92568					11.7424	8.32176
6.46548	4.59899					12.5993	11.3609
9.89178	7.46268					8.84868	10.2777
7.3113	6.75468					6.3954	12.6169
5.62406	8.87202					11.2876	9.45312
6.3357	8.0478					10.9627	7.03728
6.90054	5.14765					6.81912	10.1733
6.14892	9.45012					8.84502	11.5845
8.55246	5.57327					10.0166	9.79872
6.47526	4.40201					8.04096	9.81282
8.9466	8.4201					14.1646	10.3136
10.3184	8.2824					10.3379	9.5601
6.28998	7.04388					12.2861	11.3001
6.67446	0.526219					7.8672	9.67194
6.45024	7.22262					12.8349	9.1782
7.94532	9.2151					8.7864	7.3401
8.7942	6.29004					7.53558	8.86662
7.25502	7.11888					7.72578	10.4855
8.8545	9.10116					7.38876	8.15058
1.08041	7.76622					2.50682	8.64492
7.23528	0.111887					4.56602	7.3662
11.1466	10.7917					8.6913	9.66714
7.31994	5.63986					10.9619	7.52436
7.77114	8.86644					9.23028	5.75312
5.87782	9.28578					10.2878	31.6346
11.0322	5.47186					8.76696	10.688
7.3152	6.97842					3.25993	10.5812
9.29772	8.48112					5.74544	10.5132
6.50172	7.09062					8.09472	16.8035
8.95782	5.80687					9.11778	18.6526
7.99338	8.6607					9.2532	8.9127
5.97702	10.5049					8.32302	16.5361
7.30422	7.74756					9.05916	7.97424
3.36733	8.50044					8.7729	10.599
8.62956	6.64158					4.05607	7.17024
2.98649	10.4367					7.34094	2.88791
9.34908	7.52046					5.16875	6.30498
6.87558	7.23834					9.0777	0.82716
10.0609	6.0651					8.39856	8.45184
7.99962	6.92592					3.49433	1.08266
10.1059	9.93288					7.4055	4.0336
5.11978	4.19859					11.0828	9.46356
8.74398	7.81572					11.2486	5.6694
4.6964	7.45692					7.2297	11.1941
8.02248	6.8652					3.59967	9.01542
8.53476	9.219					5.19021	8.23296
10.4729	3.16978					5.3573	11.7082
9.5916	6.78792					8.2695	5.41346
8.77734	9.7752					9.52584	9.68844
7.41276	8.6994					0.269513	8.70312
3.90425	8.13108					6.84546	7.53924
9.71388	2.33915					9.16986	10.5959
9.00774	9.23946					7.04856	8.73714
5.90631	9.55716					3.88733	7.3854
0.701832	7.15446					8.6211	8.646
9.91584	6.47448					4.18702	11.548
4.45924	2.22497					6.95592	4.41083
16.7977	8.84718					4.00507	10.3366
6.75282	9.87708					4.35258	8.99028
7.45902	8.98056					6.02148	8.23158
	6.41982					5.85495	6.68862
	5.64487					0.733158	9.06006
	8.67564					6.35136	1.32257
	7.3623					5.83038	6.22602
	8.86584					9.93582	10.2332
	9.32304					11.4791	8.61372
	11.0906					5.79932	3.17369
	9.27636					8.12874	11.1109
	8.2284					5.663	6.45078
	8.85756					4.6928	3.97034
	18.3793					9.61368	9.198
	7.55796					8.44818	4.16414
	4.91329					11.6914	6.16008
	13.0423					10.2761	11.5238
	8.4729					9.93576	11.6369
	5.42689					4.97979	8.35584
	11.3517					8.25546	10.14
	0.41034					6.85176	9.99084
						12.1195	9.81456
						9.84174	11.5366
						10.5881	11.0775
						9.63144	8.07294
						13.2854	5.10437
						9.86952	9.69702
						9.49008	10.3055
						12.4725	7.02372
						9.23502	11.5061
						8.43522	9.91596
						12.3669	12.1999
						8.7534	7.57188
						8.61636	7.2639
						6.77448	10.1921
						12.0859	8.4897
						9.26148	10.8278
						10.3573	7.34208
						10.2378	8.754
						9.15048	9.546
						5.86966	7.00914
						7.67118	10.0742
						6.73608	8.5773
						18.7453	10.0505
						6.78822	11.0564
						10.9745	8.40378
						11.6622	8.48196
						8.4006	7.45752
						12.2362	9.91836
						16.2793	10.8376
						5.82554	10.3939
						10.8839	7.06548
						36.8012	11.9841
						9.95346	2.83639
						6.3465	8.97966
						8.87646	11.0911
						9.84924	10.6132
							15.2877
							10.4403
							9.70698
							10.0807
							11.2594
							9.83862
							8.51556
							7.05024
							5.18159
							25.4369
							11.8964
							8.43348
							7.4361
							10.8853
							7.35606
							11.4211
							6.14676
							10.2352
							19.9783
							9.49506
							4.33971
							8.45394
							11.4413
							10.6939

## Sheet: Affinity + speeds
Null	9V (6uM)	9L (100uM)
14.27	0.94	5.22
14.46	5.75	8.43
14.17	0.59	10.31
10.11	9.16	12.53
11.63	1.53	9.87
6.84	1.19	11.08
6.5	1.11	16.23
14.65	1.56	12.18
13.62	1.66	8.2
14.05	0.59	11.99
6.46	1.21	10.18
13.47	1.1	14.78
14.71	2.63	12.6
13.06	6.58	16.76
8.99	1.56	12.96
11.89	2.18	10.3
15.37	0.8	13.75
11.19	1.42	13.17
12.94	1.58	11.74
14.65	1.29	11.72
13.92	1.14	11.74
16.76	1.62	16.13
12.66	11.55	13.44
14.34	2.65	11.52
6.9	1.43	13.15
11.52	1.64	14.62
10.66	1.38	12.14
15.95	1.31	13.05
12.49	1.58	7.42
14.86	9.18	10.87
12.02	1.73	12.4
12.88	5.79	14.76
13.81	1.1	14.54
14.5	1.36	12.51
11.36	11.33	9.93
13.78	0.67	9.14
18.48	1.21	6
13.92	12.49	14.06
13.38	0.98	12.24
10.1	1.07	14.8
14.25	2.37	15.1
12.64	1.54	10.51
11.85	1.14	14.24
14.55	1.63	14.53
14.73	0.79	11.87
11.03	0.7	15.03
13.21	1.89	16.58
9.97	1.32	10.43
11.07	0.89	15.11
12.96	0.9	13.38
11.79	0.78	11.78
15.95	2.39	11.09
12.55	1.11	11.17
11.76	0.71	5.01
13.22	0.97	14.5
12.64	0.82	3.7
16.47	0.84	14.43
9.87	2.2	12.19
9.12	1.01	13.59
16.8	1.82	12.23
15.09	1.72	9.98
12.13	2.28	11.34
12.93	1.09	13.48
6.12	0.83	9.64
9.35	0.3	12.12
17.67	2.09	9.29
14.18	1.25	13.98
15.57	1.23	10.79
8.83	2.56	9.44
6.82	0.79	12.54
14.94	1.08	12.88
8.56	0.78	13.37
8.09	1.44	10.62
12.94	1.25	8.32
15.02	1.55	10.85
9.57	2.16	5.32
12.14	2.46	11.72
10.59	1.48	12.83
8.58	5.7	10.09
3.85	6.36	12.62
6.74	2.98	13.97
10.95	3.19	10.48
14.61	1.06	8.44
10.32	1.35	14.45
8.25	0.93	11.33
14.48	1.86	14.88
15.44	1.01	13.07
13.06	1.8	16.38
10.8	13.27	13.16
12.82	12.13	10.62
14.24	2.82	9.54
13.99	5.68	16.27
15.05	3.73	8.78
10.38	1.87	14.24
12.46	1.27	14.41
10.5	1.8	9.8
11.57	0.77	13.5
12.93	1.79	19.01
14.02	2.07	13.86
12.5	11.53	11.84
7.25	3.09	9.3
3.85	1.89	12.73
16.64	3.8	12.17
4.48	12.04	5.46
11.86	1.68	15.92
14.33	1.6	15.45
6.48	1.26	14.45
10.6	0.48	14.31
16.57	9.34	13.35
12.01	2.11	14.75
15.54	1.23	8.69
11.21	0.95	17.9
11.6	1.43	15.47
12.27	2.12
14.41	10.96
12.89	1.57
12.13	0.63
12.34	2.23
18.01	0.55
15.89	3.44
13.08	4.79
11.01	1.08
18.25	7.16
9.67	2.41
14.36	1.08
10.52	0.81
8.5	8.8
16.38	2.08
17.57	7.97
15.91	4.39
14.34	0.77
10.93	1.94
7.58	10.46
14.65	0.9
14.22	2.15
13.69	2.05
13.14	8.53
9.32	14.43
11.52	7.27
8.29	7.55
12.85	3.93
15.22	1.09
12.47	6.65
12.57	2.69
12.25	5.56
8.97	2.01
13.42	12.98
13.7	1.88
13.12	2.82
14.18	0.95
17.08	7.48
13.58	13.02
16.6	10.55
13.6	1.19
12.18	1.22
10.71	6.68
13.38	8.48
12.86	1.3
15.27	4.74
13.13	12.08
14.91	1.28
5.67	1.77
14.97	3.06
13.83	7.32
7.65	1.22
11.79	10.72
11.11	1.4
11.46	1.44
15.92	0.6
12.44	1.97
11.49	1.41
10.58	1.44
10.03	2.73
6.78	9.98
10.98	5.39
9.73	1.16
14.48	1.17
8.47	11.02
11.35	1.71
10.75	2.04
10.9	0.78
13.14	1.9
10.72	3.87
7.7	0.69
10.65	1.29
11.14	11.31
10.29	1.69
13.91	11.77
12.75	3.35
12.15	3.47
13.26	1.36
13.26	0.93
15.15	1.32
11.24	12.63
14.06	2.02
9.5	1.87
10.31	1.1
11.28	10.43
14.22	8.05
11.48	4.19
11.75	1.32
14.7	9.24
12.41	1.62
11.32	1.78
14.36	9.34
12.96	4.02
10.36	0.7
10.14	12.66
14.36	2.24
14.82	1.04
8.98	0.99
10.3	12.06
7.12	1.54
10.6	5.49
11.13	2.5
10.04	4.33
8.14	9.28
7.24	3.31
10.89	1.34
11.61	0.6
9.2	12.07
8.23	1.5
6.53	7.72
12.17	4.67
17.1	2.72
8.91	1.4
15.05	0.83
17.6	8.33
13.48	1.14
4.06	7.82
	14.03
	2.26
	4.44
	1.16
	1.57
	1.58
	2.27
	4.22
	1.12
	12.47
	5.36
	2.14
	1.12
	8.97
	0.58
	1.3
	12.05
	2.49
	13.78
	2.22
	0.83
	1.93
	10.64
	12.01
	2.62
	16.34
	7.58
	1.96
	11.09
	2.48
	11.89
	1.4
	8.4
	10.46
	1.33
	1.25
	11.93
	9.48
	11.96
	13.05
	1.99
	0.9
	0.94
	3.04
	6.74
	6.46
	1.23
	0.62
	3.76
	1.32
	2.35
	5.97
	9.9
	2.25
	0.79
	6.43
	2.26
	1.51
	5.39
	10.06
	1.3
	9.14
	1.05
	8.96
	3.51
	12.93
	3.59
	1.33
	5.59
	0.54
	1.4
	1.43
	2.68
	10.18
	2.93
	2.71
	9.02
	6.18
	2.22
	1.69
	10.33
	1.24
	10.22
	1.36
	2.72
	6.71
	2.27
	1.49
	9.29
	1.78
	1.21
	2.49
	0.2
	0.49
	1.35
	0.49
	4.49
	2.29
	7.11
	4.63
	1.3
	2.55
	2.7
	3.56
	0.78
	11.85
	13.76
	11.14
	4.55
	3.02
	4.89
	2.54
	0.7
	1.16
	1.28
	1.22
	1.82
	1.87
	1.84
	1.45
	2.47
	0.64
	0.97
	10.88
	13.39
	5.94
	2.35
	7.68
	0.52
	0.77
	1.32
	2.26
	2.18
	2.9

## Sheet: Matrices
Bovine Collagen I		Human Collagen I		Complete Collagen I		Matrigel		GelTrex
Donor 1	Donor 2	Donor 1	Donor 2	Donor 1	Donor 2	Donor 1	Donor 2	Donor 1	Donor 2
0.157982	1.66434	2.56771	5.3034		6.5802		12.086		12.6099
0.207939	10.6394	0.200161	5.81091		2.23978		10.95		1.0569
2.0864	17.8085	7.05307	13.0204		5.50859		10.3522		8.39855
0.225192	9.16573	7.82823	6.59627		5.40476		6.61581		7.15659
2.40701	8.44249	10.9154	11.1303		6.54783		3.80018		4.33757
6.5437	12.9195	10.0505	13.854		3.20013		11.6322		3.53742
5.29497	9.52506	8.04671	6.72038		3.55654		3.29692		6.17923
6.36783	12.8068	12.2889	8.12007		3.07472		10.4857		8.47111
0.655478	11.1737	9.49881	8.74709		6.85997		1.81008		10.4822
5.03854	7.0645	5.59573	11.2169		5.49409		12.1478		5.26121
1.43063	14.7154	7.28575	12.2553		8.32983		8.87288		7.06781
7.88594	12.7238	9.69604	9.19654		11.4248		8.79617		5.04954
4.19001	13.113	10.1026	8.07087		4.26481		8.79291		8.79613
5.438	12.7826	0.23073	11.4774		10.6515		3.4578		10.9609
5.71509	10.0622	3.47611	8.92853		5.47633		8.73059		4.54296
7.84665	11.9055	8.16394	7.00159		7.56223		14.7477		7.4874
6.53031	17.0865	4.45524	7.85249		7.30303		10.5253		5.6967
2.8765	10.9017	10.0909	8.47098		10.1637		5.8502		6.46525
1.57694	11.1431	9.6095	6.86629		6.73167		7.14799		12.6524
3.08051	11.179	10.0155	8.04992		4.22284		8.05793		0.851473
2.87545	5.16852	6.39649	11.1038		4.61299		7.17645		2.55187
0.179446	12.7548	5.00776	4.74205		4.53063		14.4536		12.6304
3.3293	6.44579	5.04012	5.75485		8.45085		9.47484		5.08449
0.214142	17.5856	0.170786	10.5385		5.41709		12.1225		7.69413
0.902053	4.03677	3.85484	3.86081		3.03241		6.47678		7.51604
0.402713	12.9876	8.8202	8.81788		7.57223		4.37935		7.46098
1.9863	12.6036	0.104208	12.4198		3.38654		9.11395		2.64931
0.174301	10.2374	10.1189	9.09647		11.5962		7.78082		4.60037
8.81018	4.82359	7.96302	11.8552		3.41751		9.00011		8.75828
0.236613	5.00342	6.16238	11.7055		7.18698		4.87864		8.99265
6.9696	7.41205	8.67317	4.98222		4.91922		12.6135		10.1728
1.00665	16.6738	10.0287	9.11638		3.77738		10.4858		14.2986
5.69346	4.80471	4.65641	9.40805		1.36274		2.18517		7.82739
4.78016	14.2567	2.76006	4.80577		4.54613		5.07472		7.84538
6.87954	10.8447	0.434693	8.78682		2.69713		9.57273		7.29581
1.75301	12.0164	0.0891124	6.80564		3.25838		4.18021		4.80178
9.40328	15.7855	5.58002	4.87803		3.48983		4.46003		5.84421
7.83432	12.9241	3.1281	11.1549		7.55345		9.24605		13.3435
1.66876	5.89969	2.56867	11.536		6.27152		2.4992		8.59052
0.982813	13.5523	1.58386	14.008		2.62517		10.0549		5.30653
1.38482	6.09117	0.236495	7.79977		5.19056		2.01446		3.73865
1.35519	13.3469	10.5815	8.05642		6.01535		10.2123		9.63617
4.33584	14.3	9.45104	4.56393		11.9907		10.2935		1.08988
0.320761	13.0294	6.55548	1.85617		5.96941		9.07113		12.3885
3.18046	16.0997	10.5353	8.95584		7.13956		2.89469		8.4592
2.96966	11.8158	11.3763	6.63084		4.88443		4.74819		4.33224
6.32563	4.55741		7.65586		4.0178		11.705		4.37945
0.9698	8.41042		3.96698		4.70921		16.0127		8.02491
1.50965	6.43862		5.02612		1.96394		4.31762		5.83303
2.66956	10.8996		13.6145		7.24447		8.14289		7.86696
0.212405	11.7302		11.8054		12.5475		4.47142		12.6862
0.166356	2.13272		5.18346		2.17125		6.38138		8.56419
0.934212	5.47571		12.1791		7.61678		4.23629		3.00073
0.211675	3.72658		5.32847		4.50632		15.7125		9.27734
6.72484	11.6605		7.17048		4.45323		7.08335		2.92949
8.68679	10.507		15.8799		8.77733		5.24887		6.71897
5.16267	14.1056		2.99418		7.30829		4.96787		7.99102
0.255662	10.7451		8.44266		7.23474		10.4989		1.85205
3.24727	8.0478		1.97013		9.70712		7.23238		7.64297
9.94763	10.4575		5.45123		6.54087		12.3411		13.3811
8.09641	8.49964		12.0991		9.56841		7.49569		7.05666
6.96351	13.2738		9.96228		7.29809		3.74034		8.14383
9.75912	12.1329		6.44602		6.99866		3.84688		11.0906
5.98502	6.85773		8.509		5.72964		6.69622		9.27248
10.1834	13.241		11.0668		5.01186		7.09347		12.229
7.09797	3.96424		12.6079		2.92346		10.8105		4.18628
3.00559	2.64648		15.0028		5.51378		1.44853		8.27002
0.238394	12.7186		10.3951		3.94474		15.8697		9.42909
2.96767	8.59758		4.81838		2.37472		10.4956		16.2122
10.7279	10.0184		1.7833		8.21096		22.5079		17.0747
10.0886	11.4239		1.48903		4.67818		12.8478		8.28428
0.162442	9.48964		7.94519		5.81403		17.5946		11.9125
5.55133	6.79871		8.88633		3.13266		5.78285		10.3263
4.72885	5.45416		5.5542		3.9706		11.0297		7.46002
2.81105	5.32554		11.8595		4.20281		7.81577		12.591
7.86444	4.02411		10.2821		7.75913		17.3367		10.2448
9.07714	1.54013		8.75503		9.21278		9.51748		14.2787
9.69013	12.3698		9.7725		7.17401		4.97304		12.4919
9.08892	5.36349		12.5028		3.11899		6.45008		9.78086
5.96712	3.17181		6.40011		2.59144		8.00106		9.76572
7.22843	10.1545		8.53014		3.88686		19.2265		8.2647
0.382393	4.36496		8.83619		3.61969		7.72185		10.4367
0.559241	10.0284		6.82496		12.2346		10.2707		9.86523
0.169157	1.22081		6.49151		8.99584		4.64776		2.22806
0.238365	10.1309		11.3255		3.51817		11.3989		14.4
3.23181	7.85179		3.92729		3.86606		12.4567		8.44319
7.14561	14.3243		12.1441		6.02194		8.69117		7.62508
5.27298	16.3939		9.06724		9.35555		18.7353		7.65454
0.255892	0.965031		6.28614		5.84274		8.15324		2.71625
6.00597	8.47598		8.04987		9.70543		6.51394		8.73734
0.565634	2.44914		13.6782		10.1311		3.7732		2.28477
0.495044	7.4385		11.9612				5.30965		3.81581
10.3609	8.01957		7.84408				11.306		6.20288
5.9389	1.74412		5.7848				12.0192		11.9584
9.59235	9.39935		7.89548				6.64049		2.30027
5.9783	12.1766		0.730876				14.2867		11.1274
10.3172	9.92093		10.3596				8.75931		3.14367
8.95193	14.6143		4.75236				5.09138		11.9571
2.57655	11.0015		7.27209				4.85025		13.1341
2.22328	11.3738		1.34807				15.8317		9.33753
1.26032	13.6616						3.54822		4.95451
	13.7147						8.05525		6.68954
	12.3718						4.96881		9.37079
	15.4961						7.75422		7.55661
	13.7696						7.9652		5.4261
	16.1314						11.4664		2.74644
	12.2144						10.0553		6.79337
	3.54111						8.8567		3.62612
	5.00044						8.77557		6.08363
	14.7143						8.95679		9.35577
	11.8477						7.57548		11.342
	6.1987						12.1529		7.4033
	1.55755						9.30272		9.80727
	9.2506						7.5439		4.73062
	14.3635						8.90132		5.04927
	16.7232						7.25654		7.04331
	6.26619						4.50862		2.64263
	10.396						5.16947		1.57101
	11.0317						7.79214		5.1814
	6.57217						6.22606		0.947833
	9.75168						5.27305		1.26213
	8.14323						17.565		4.6367
	4.97955						11.3243		2.92282
	5.82183						14.0124		5.45288
	4.1928						5.54223		4.56997
	5.98167						8.39257		13.2668
	11.1549						11.1266		8.83459
	16.4017						10.4095		8.14261
	7.20352						12.2405		5.8311
	12.078						1.55064		10.0094
	9.09809						9.04816		9.55888
	2.24417						11.2712		4.97595
	12.1651						9.63941		15.6857
	0.734839						13.2018		3.3075
	7.0236						14.0245		5.60144
	4.03603						14.1797		19.0048
	7.48868						5.57419		13.5692
	10.9683						10.4171		5.72071
	13.9588						9.90394		3.35116
							11.2911		8.20112
							13.4741		3.91953
							5.78662		7.85888
							13.7297		9.69145
							7.67012		10.6773
							11.5849		14.7594
							8.0581		10.495
							7.83109		10.9157
							2.75439		6.72446
							17.361		5.38805
							9.25642		4.84287
							12.0604		8.99752
							4.76044		9.50564
							5.40658		6.35855
							5.8524		4.34054
							16.5105		7.25145
							7.68061		3.36379
							7.99225		2.85477
							12.6309		1.15014
							7.71003		8.04558
							8.39326		6.30785
							8.52007		3.44319
							12.8858		6.20693
							6.74748		1.00782
							5.83038		6.59382
							20.1127		1.54313
							14.5858		6.36536
							7.58554		0.918977
							10.7293		3.02959
							6.31993		3.80412
							2.2807		9.60367
							10.5174		8.64654
							9.59954		20.0576
							4.31389		13.5583
							8.65986		11.3995
							9.03946		6.12147
							11.7326		19.139
							8.7962		7.74253
							4.24497		7.75653
							12.2292		9.44569
							2.91911		8.15277
							2.45725		12.209
							11.4135		5.79686
							6.24375		8.58797
							4.3209		7.83641
							6.04016		18.2325
							12.0451		3.5499
							18.8594		4.8031
							10.3868		13.6487
							5.26857		11.0939
							11.9478		10.0177
							13.1686		7.19866
							7.08414		10.8341
							14.6794		9.78913
							14.3377		12.9984
							7.3826		6.25101
							8.79826		11.6047
							2.78241		4.08643
							8.69061		13.8125
							11.8018		23.0231
							11.3229		6.08469
							3.60937		3.25339
							4.81247		6.48674
							5.80131		10.7431
							8.4402		12.901
							5.58952		11.8333
							8.10246		8.11433
							2.05532		12.2415
							6.47589		7.32094
							8.33539		10.6382
							3.46184		9.4388
							4.64363		4.53618
							8.37341		14.1071
							5.84319		5.85901
							6.83978		2.16733
							10.4592
							9.00296
							11.6334
							9.5744
							2.01088
							4.4885
							8.52237
							14.5171
							5.98316
							7.68681
							7.01082
							8.74522
							11.6691
							7.74561
							1.24955
							8.53015
							8.23861
							10.7661
							14.5538
							5.81221
							9.37238
							12.7785
							16.6005
							13.6562
							2.7353
							9.41365
							8.35785
							11.0976
							13.3374
							12.6738
							6.36636
							13.0638
							10.8504
							2.7635
							11.6888
							6.70625
							13.193
							9.23738
							9.38895
							9.38803
							4.12997
							8.77833
							6.14296
							8.60156
							12.7203
							7.99356
							10.2999
							16.4879
							12.042
							12.1037
							13.3525
							11.3814
							7.319
							13.6305
