# Supplementary figures and images for: A tissue-like platform for studying engineered quiescent human T-cells’ interactions with dendritic cells
Source: eLife journal article supplement (doi:10.7554/elife.48221), 2019-09-25

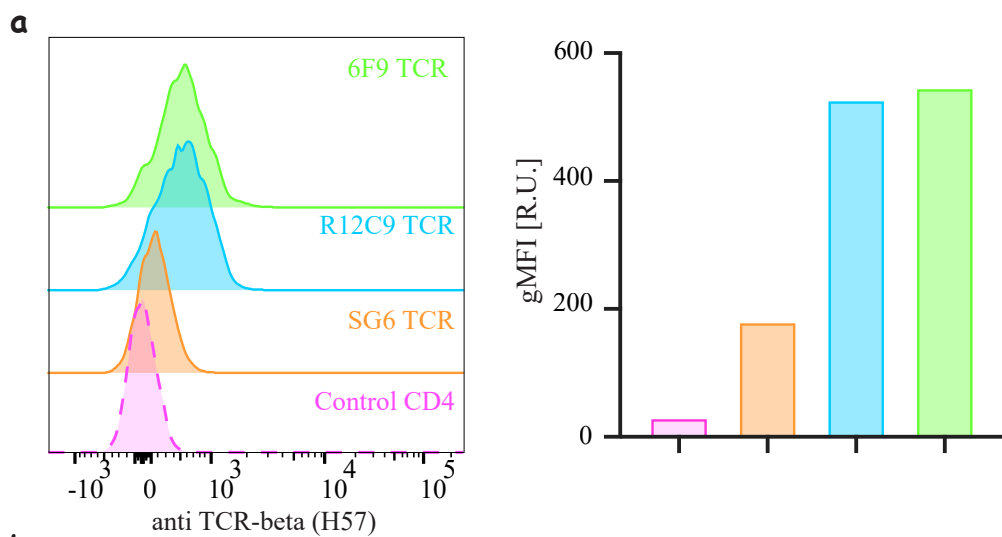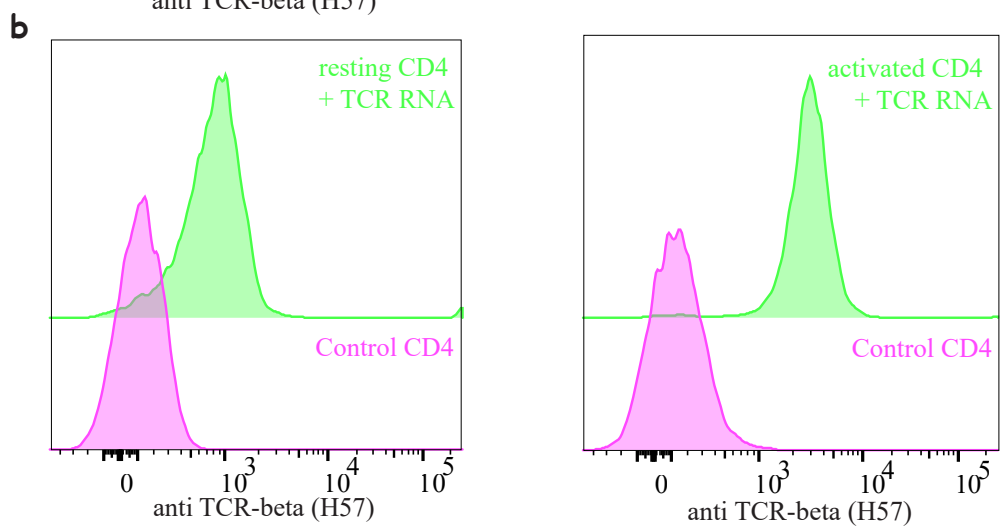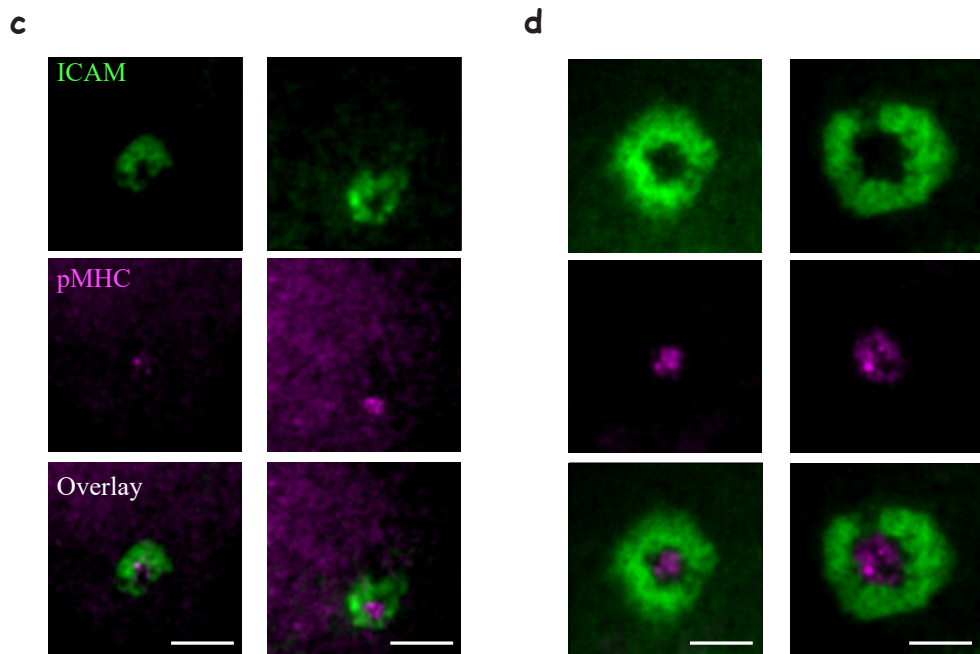

Figure 2- Supplement 4  
Abu-Shah et al

Supplement: supp [file elife-48221-supp-v1.zip]

**a**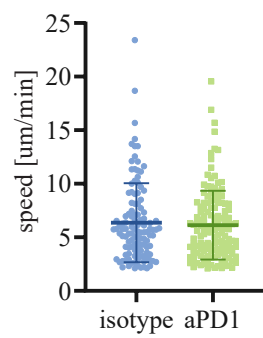**b**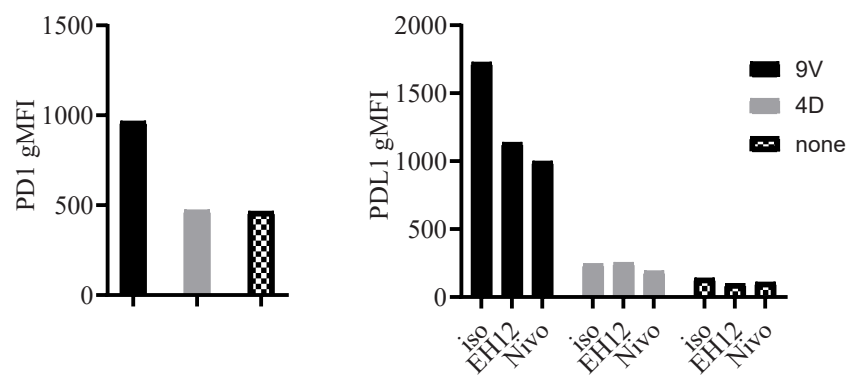

Figure 5- Supplement 1  
Abu-Shah et al

Supplement: supp [file elife-48221-supp-v1.zip]

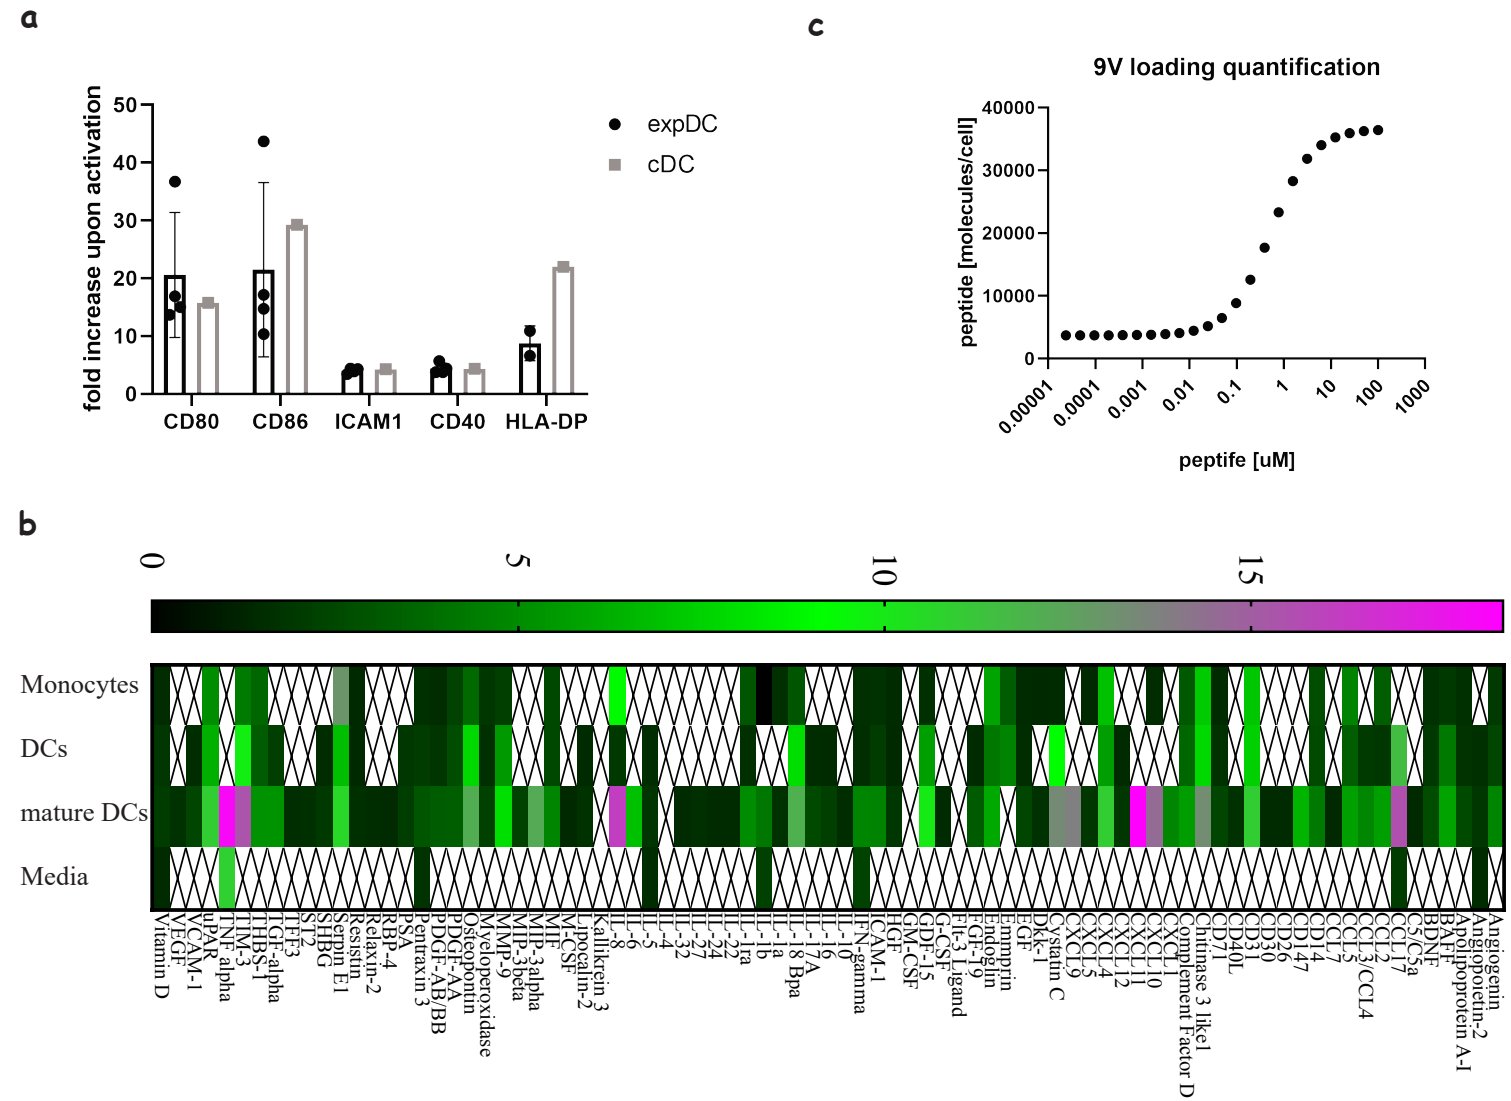

Figure 3- Supplement 1  
Abu-Shah et al

Supplement: supp [file elife-48221-supp-v1.zip]

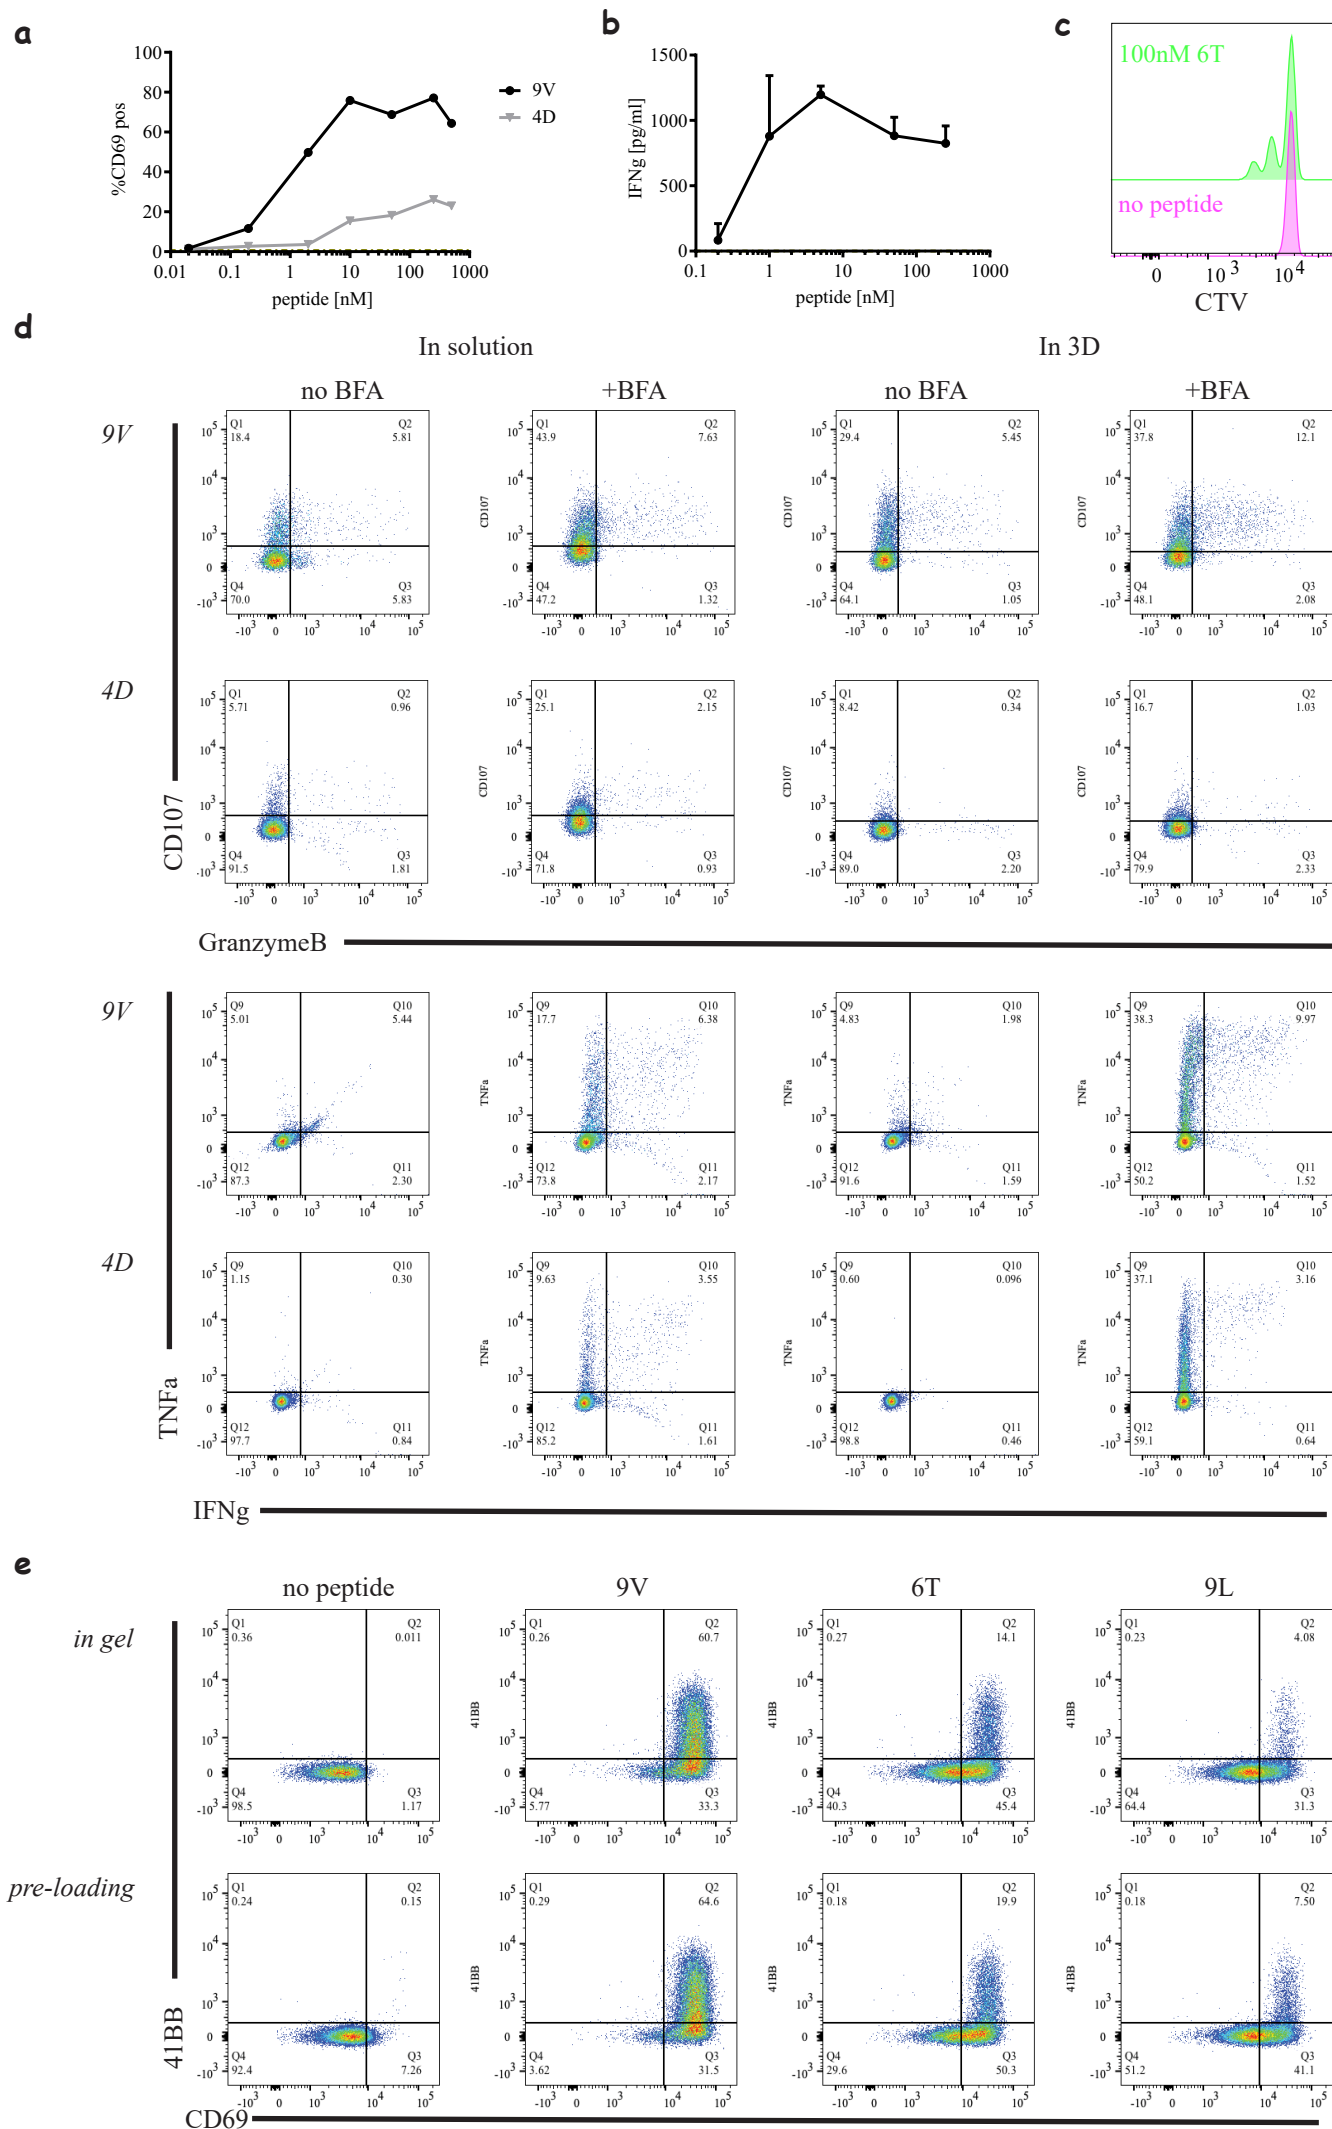

**Figure 4- Supplement 2**  
**Abu-Shah et al**

Supplement: supp [file elife-48221-supp-v1.zip]

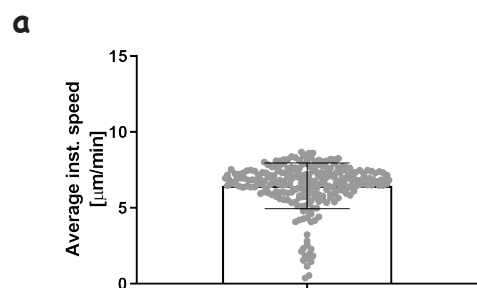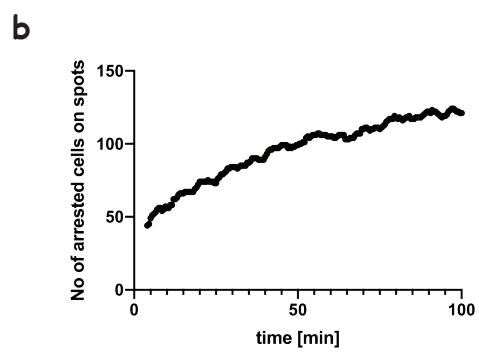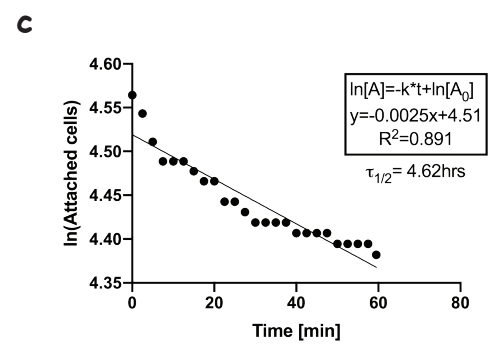

Figure 2- Supplement 5  
Abu-Shah et al

Supplement: supp [file elife-48221-supp-v1.zip]

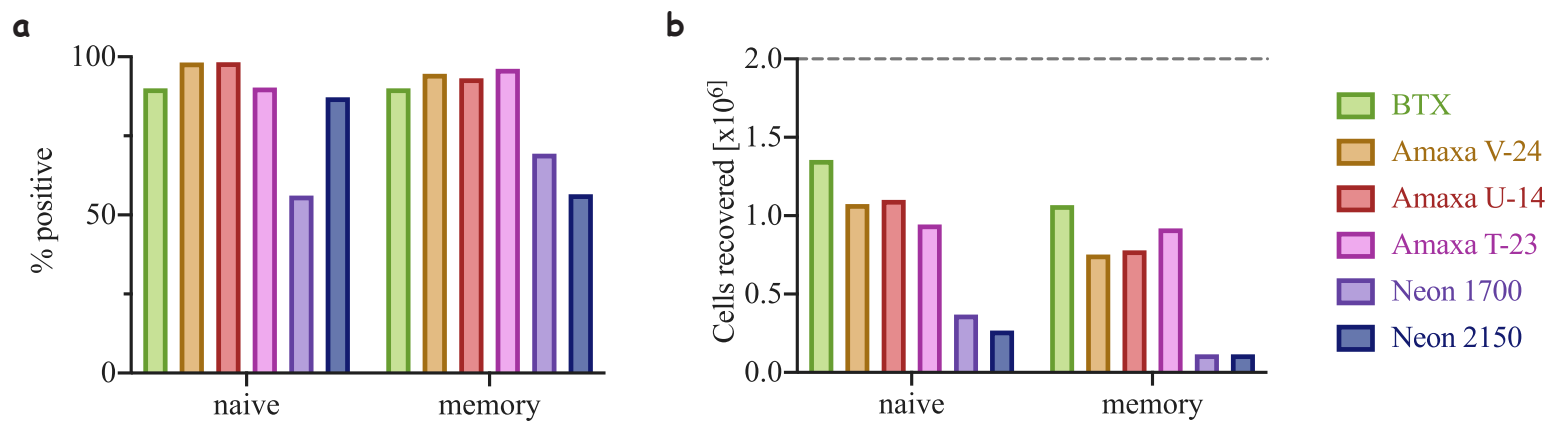

Figure 2- Supplement 3  
Abu-Shah et al

Supplement: supp [file elife-48221-supp-v1.zip]

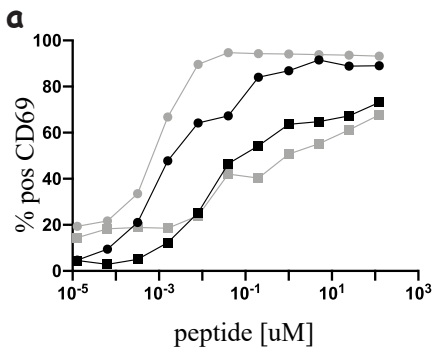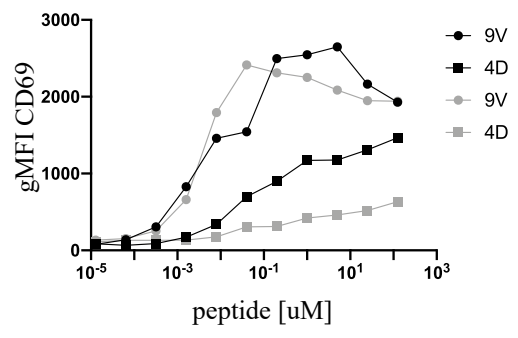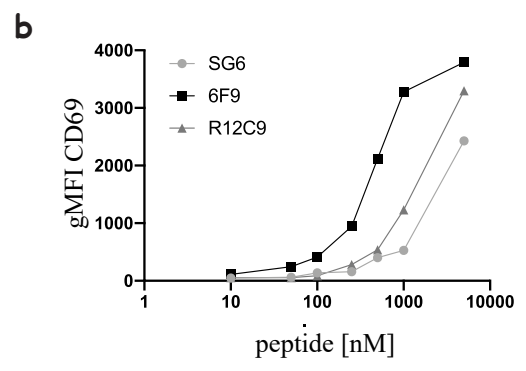

Figure 2- Supplement 2  
Abu-Shah et al

Supplement: supp [file elife-48221-supp-v1.zip]

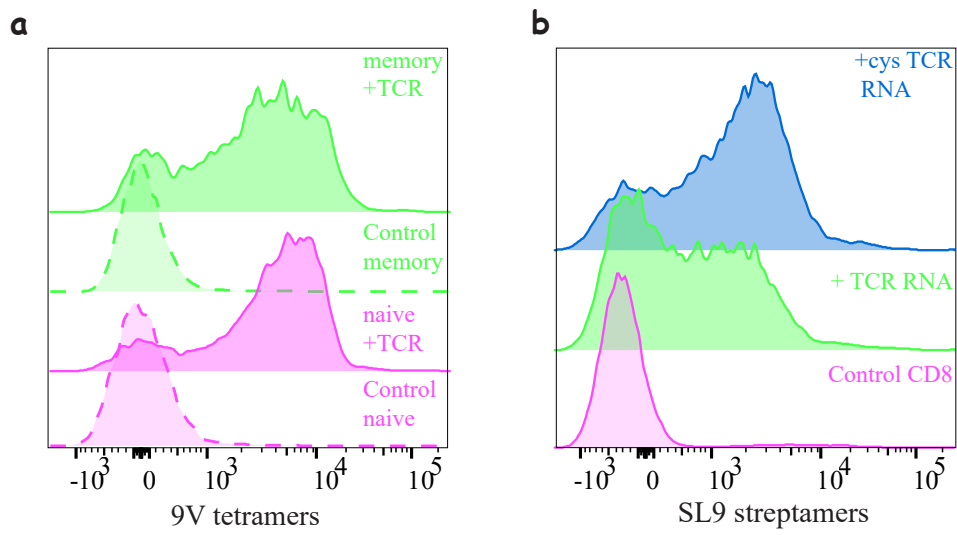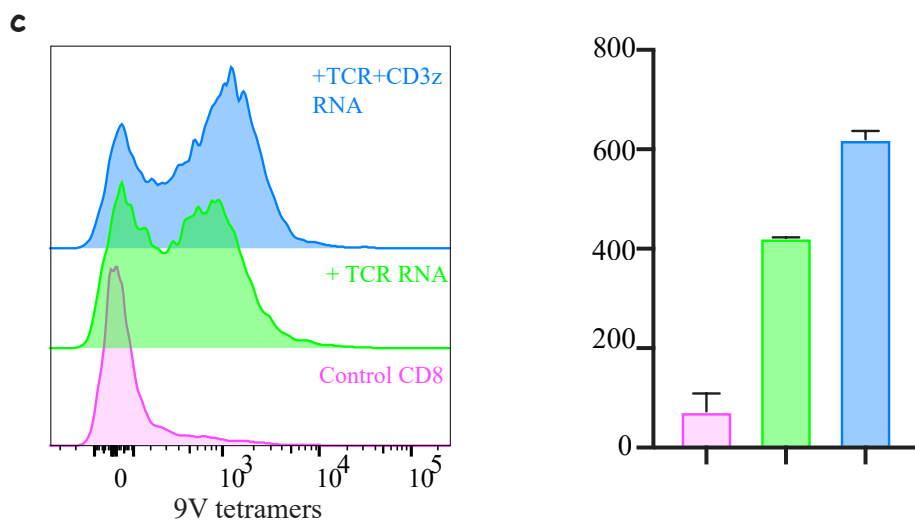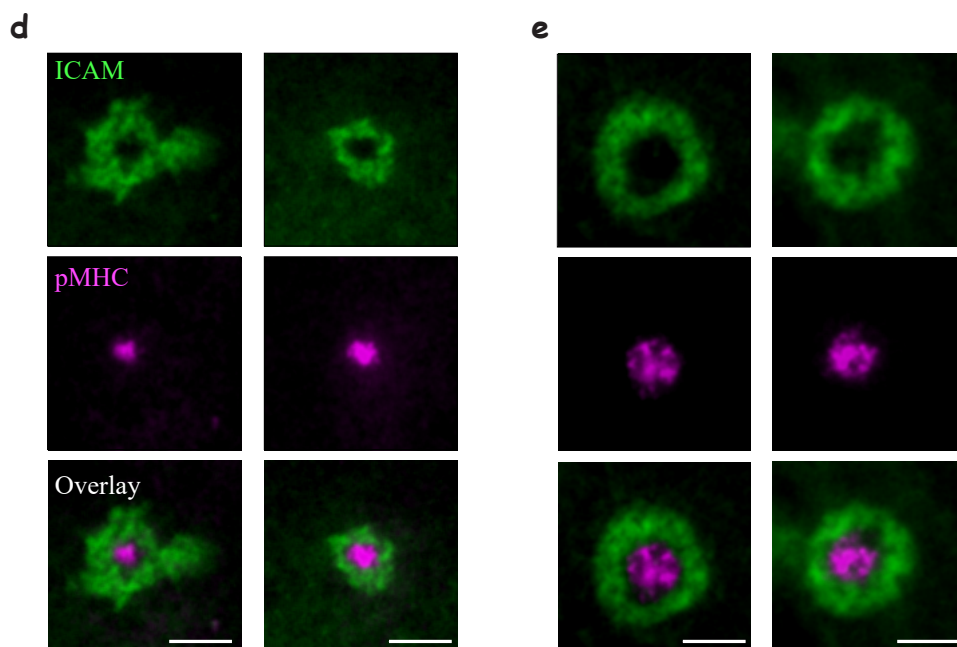

Figure 2- Supplement 1  
Abu-Shah et al

Supplement: supp [file elife-48221-supp-v1.zip]

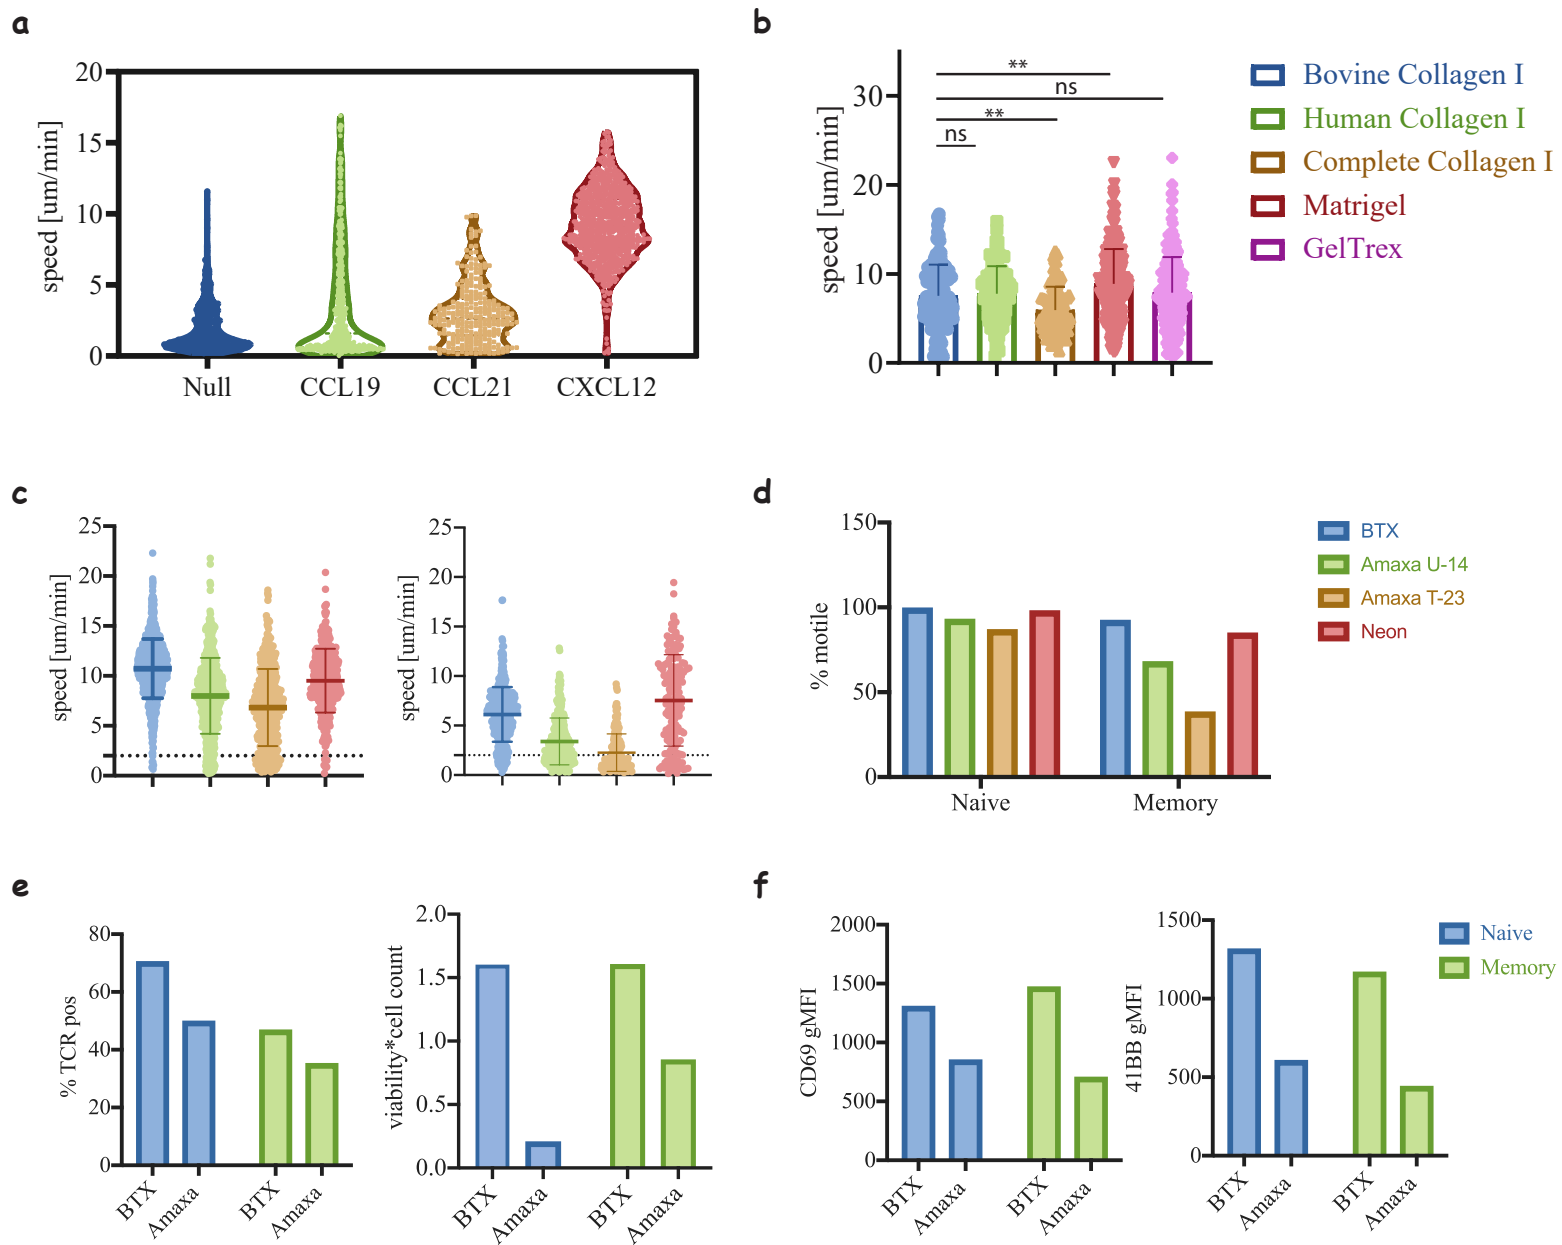

**Figure 4- Supplement 1**  
**Abu-Shah et al**

Supplement: supp [file elife-48221-supp-v1.zip]
